# Supplementary material for: Influenza A(H5N1) Viruses Isolated From Dairy Cattle Demonstrate High Virulence in Laboratory Models, but Retain Avian Virus-like Properties
Source: Research Square preprint supplement (doi:10.21203/rs.3.rs-5806806/v1), 2025-02-05
Supplement: Supplementary file 1 [file 42da03e8f6eaa719039d4c13.docx]

**Supplementary Materials for**

Influenza A(H5N1) viruses isolated from dairy cattle demonstrate high virulence in laboratory models, but retain avian virus-like properties

**AUTHORS**: Thomas P. Fabrizio1, Ahmed Kandeil1,2, Walter Harrington1, Jeremy C. Jones1, Trushar Jeevan1, Konstantin Andreev1, Patrick Seiler1, Jonathan Fogo1, Morgan L. Davis1, Jeri Carol Crumpton1, John Franks1, Jennifer DeBeauchamp1, Peter Vogel3, C. Scanlon Daniels4, Rebecca L. Poulson5, Andrew S. Bowman6, Elena A. Govorkova1, Richard J. Webby1

Correspondence to: [richard.webby@stjude.org](mailto:richard.webby@stjude.org)

**This file includes:**

  Supplementary Figures 1 and 2

Supplementary Tables 1 to 5

Supplementary Methods

Supplementary Results

**SUPPLEMENTARY FIGURES**

**
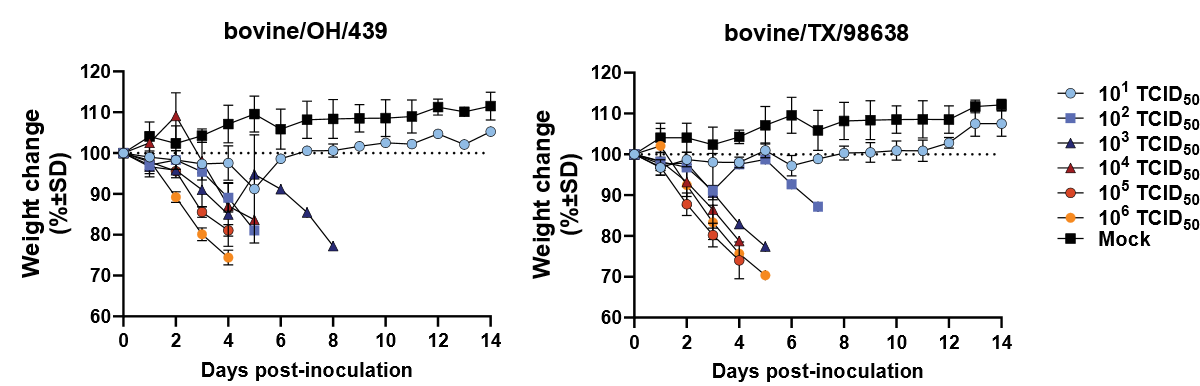

Supplementary Fig. 1. Weight loss in mice inoculated with bovine A(H5N1) 2.3.4.4b viruses.** Female 6- to 8-week-old BALB/c mice were lightly anesthetized with isoflurane and inoculated IN with 101 to 106 TCID50/mouse of **a**, bovine/OH/439 (H5N1) and **b**, bovine/TX/98638 (H5N1) viruses (n = 3/virus dose). Control mock-inoculated mice received sterile PBS. Mice were weighed daily, and the loss or gain of weight was calculated for each mouse as the percentage change in the initial mean weight at 0 dpi. Values are the average ± SE for each group.

**
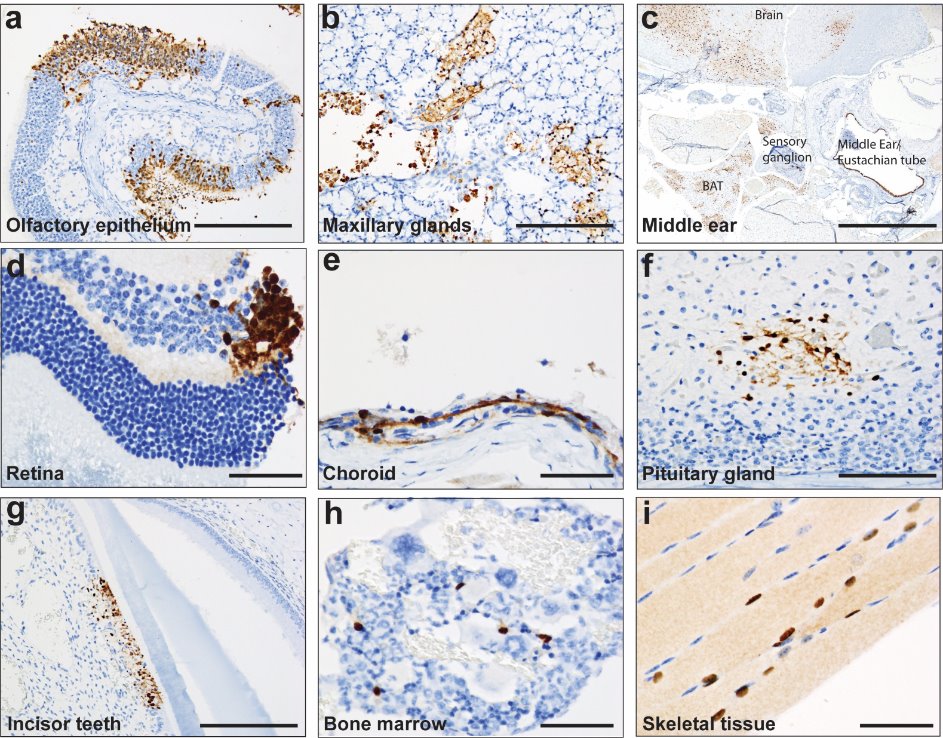
**

**Supplementary Fig. 2. Histopathology of disseminated infection in mice inoculated with bovine A(H5N1) 2.3.4.4b viruses.** Immunohistochemistry of fixed tissues from A(H5N1) virus-infected mice showed massive virus antigens detected systemically in olfactory epithelium (scale bar, 200 µm) (**a**), maxillary glands (scale bar, 200 µm) (**b**), middle ear/eustachian tube (scale bar,1 mm) (**c**), retina (scale bar, 50 µm) (**d**), choroid (scale bar, 50 µm) (**e**), pituitary gland (scale bar, 100 µm) (**f**), developing incisor teeth (odontoblasts only, scale bar, 200 µm) (**g**), bone marrow (scale bar, 50 µm) (**h**) and skeletal muscle (scale bar, 50 µm) (**i**).

**SUPPLEMENTARY TABLES**

**Supplementary Table 1.** Amino acid differences between bovine and avian A(H5N1) 2.3.4.4b viruses and WHO-recommended CVVs​

| Influenza A(H5N1) virus | Amino acid position in HA1a | | | | | | | | | Amino acid position in HA2a | | Fold-change to Astrakhan/3212 |
| --- | --- | --- | --- | --- | --- | --- | --- | --- | --- | --- | --- | --- |
| 71 | 83b | 104 | 115 | 156c | 185d | 195 | 199 | 210 | 493 | 510 |
| Astrakhan/3212 | I | A | L | L | A | E | T | S | V | E | I |  |
| wigeon/SC/345 |  |  | M |  |  |  |  |  | A |  | V | 2 |
| eagle/FL/22 | T |  | M |  |  |  |  |  | A |  | V | 2 |
| bovine/OH/302 |  |  | M | Q |  |  | I |  | A | G | V | 8 |
| bovine/OH/342 |  |  | M | Q |  |  | I |  | A |  | V | 2 |
| bovine/OH/358 |  |  | M | Q |  |  | I |  | A | G | V | 2 |
| bovine/OH/368 |  |  | M | Q |  | G | I |  | A | G | V | 16 |
| bovine/OH/432 |  |  | M | Q |  |  | I |  | A |  | V | 2 |
| bovine/OH/439 |  |  | M | Q |  |  | I |  | A |  | V | 0 |
| bovine/OH/497 |  |  | M | Q |  |  | I |  | A |  | V | 2 |
| bovine/OH/541 |  |  | M | Q |  |  | I |  | A |  | V | 2 |
| bovine/TX/3301 |  |  | M | Q |  |  | I |  | A |  | V | 2 |
| bovine/TX/38161 |  |  | M | Q | T |  | I |  | A |  | V | 2 |
| bovine/TX/40106 |  |  | M | Q |  |  | I |  | A |  | V | 0 |
| bovine/TX/42041 |  |  | M | Q | T |  | I |  | A |  | V | 4 |
| bovine/TX/43134 |  |  | M | Q | T |  | I |  | A |  | V | 2 |
| bovine/TX/97794 |  |  | M | Q | T |  | I |  | A |  | V | 4 |
| bovine/TX/98638 |  |  | M | Q |  |  | I |  | A |  | V |  |
| goose/KS/930F |  | S | M | Q |  |  | I | T | A |  | V | 8 |
| goose/LA/957 |  |  | M | Q |  |  | I |  | A |  | V | 4 |

aAmino acid residue in the HA 1 and HA2 regions of HA protein are indicated by H5 influenza A virus numbering.
bAntigenic site E.

cAntigenic site B, HA-A156T is predicted to add a glycosylation motif.

dAntigenic site B.

**Supplementary Table 2.** Bovine influenza A(H5N1) viruses with genetic markers of RI/HRI by NAIs and CENI with GISAID accession numbers

| Bovine influenza A(H5N1) virus | Amino acid substitution | GISAID  isolate IDa |
| --- | --- | --- |
| *Viruses carrying NAI RI marker* |  |  |
| A/dairy cow/Texas/24_009367-001/2024 | NA-T438Ib | EPI_ISL_19094612 |
| *Viruses carrying CENI RI markers* |  |  |
| A/dairy cow/Texas/UTMB11/2024 | PA-A36Tb | EPI_ISL_19184044 |
| A/dairy cow/USA/24_025747-008/2024 | PA-A36T | EPI_ISL_19444922 |
| A/dairy cow/Idaho/24_011573-013/2024 | PA-A37T | EPI_ISL_19228203 |

aRetrieved from the Global Initiative on Sharing All Influenza Data (GISAID) and the National Center for Biotechnology (NCBI) Influenza Virus Resource databases, accessed November 8, 2024. Overall, 1489 NA and 1406 PA sequences were analyzed.

bAmino acid residue substitutions in the NA protein are indicated by N1 numbering and in the PA protein by influenza A virus numbering.

**Supplementary Table 3.** Reactivity of bovine and avian A(H5N1) 2.3.4.4b viruses with ferret antisera against clade 2.3.4.4c and 2.3.4.4b CVVsa

| CVV and influenza A(H5Nx) virus | Subtype | HA clade | HI titer with ferret antiserum against A(H5Nx) influenza virusa | | | | |
| --- | --- | --- | --- | --- | --- | --- | --- |
| Astrakhan/3212  (H5N8) 2.3.4.4b | ck/Ghana/39  (H5N1) 2.3.4.4b | wigeon/SC/345  (H5N1) 2.3.4.4b | eagle/FL/W22  (H5N1) 2.3.4.4b | gyrfalcon/41088  (H5N8) 2.3.4.4c |
| *Reference CVV* | | | | | | | |
| Astrakhan/3212 | H5N8 | 2.3.4.4b | **160** | 80 | 160 | 80 | 160 |
| ck/Ghana/39 | H5N1 | 2.3.4.4b | 40 | **80** | 160 | 10 | < |
| wigeon/SC/345 | H5N1 | 2.3.4.4b | 80 | 80 | **160** | 160 | 80 |
| eagle/FL/W22 | H5N1 | 2.3.4.4b | 80 | 80 | 160 | **160** | 80 |
| gyrfalcon/41088 | H5N8 | 2.3.4.4c | 160 | < | 80 | 160 | **320** |
| *Bovine and avian influenza virus* | | | | | | | |
| bovine/OH/302 | H5N1 | 2.3.4.4b | 20 | 80 | 160 | 160 | 10 |
| bovine/OH/342 | H5N1 | 2.3.4.4b | 80 | 80 | 160 | 160 | 80 |
| bovine/OH/358 | H5N1 | 2.3.4.4b | 80 | 80 | 160 | 160 | 80 |
| bovine/OH/368 | H5N1 | 2.3.4.4b | 10 | 40 | 80 | 80 | < |
| bovine/OH/432 | H5N1 | 2.3.4.4b | 80 | 160 | 160 | 160 | 160 |
| bovine/OH/439 | H5N1 | 2.3.4.4b | 160 | 160 | 320 | 320 | 160 |
| bovine/OH/497 | H5N1 | 2.3.4.4b | 80 | 160 | 160 | 160 | 40 |
| bovine/OH/541 | H5N1 | 2.3.4.4b | 80 | 80 | 160 | 160 | 80 |
| bovine/TX/3301 | H5N1 | 2.3.4.4b | 80 | 80 | 160 | 160 | 40 |
| bovine/TX/38161 | H5N1 | 2.3.4.4b | 80 | 160 | 160 | 20 | < |
| bovine/TX/97794 | H5N1 | 2.3.4.4b | 40 | 80 | 160 | 20 | < |
| bovine/TX/43134 | H5N1 | 2.3.4.4b | 80 | 160 | 320 | 40 | < |
| bovine/TX/40106 | H5N1 | 2.3.4.4b | 160 | 80 | 160 | 160 | 320 |
| bovine/TX/42041 | H5N1 | 2.3.4.4b | 40 | 80 | 160 | 20 | < |
| goose/KS/930F | H5N1 | 2.3.4.4b | 20 | 40 | 40 | 40 | < |
| goose/LA/957 | H5N1 | 2.3.4.4b | 40 | 80 | 80 | 80 | 10 |

aExpressed as the reciprocal of the highest serum dilution that inhibited 4 HAU units of virus. Results are the arithmetic mean titer of positive sera (HI titer >10). < indicates HI titer < 10. HI tests used 0.5% chicken RBCs. Homologous titers are typed in bold and underlined.

**Supplementary Table 4.** Individual cross-reactive HA antibodies in human sera against bovine A(H5N1) 2.3.4.4b viruses

| No. human sera | HI titer with human serum against A(H5Nx) influenza virusa | | | | |
| --- | --- | --- | --- | --- | --- |
|  |
| gyrfalcon/41088 (H5N8) 2.3.4.4c | bovine/OH/342 (H5N1) 2.3.4.4b | bovine/TX/97794 (H5N1) 2.3.4.4b | bovine/TX/40106 (H5N1) 2.3.4.4b | bovine/OH/368 (H5N1) 2.3.4.4b |  |
| 1 | 640 | 80 | 80 | 80 | 40 |  |
| 2 | 320 | 80 | 40 | 80 | 20 |  |
| 3 | 320 | 320 | 160 | 320 | 160 |  |
| 4 | 160 | 80 | 40 | 40 | 40 |  |
| 5 | 1280 | 640 | 320 | 640 | 640 |  |
| 6 | 160 | 40 | 40 | 80 | 40 |  |
| 7 | 160 | 80 | 80 | 80 | 80 |  |
| 8 | 160 | 160 | 80 | 160 | 80 |  |
| 9 | 80 | 80 | 40 | 40 | 40 |  |
| 10 | 640 | 320 | 160 | 320 | 160 |  |
| 11 | 80 | 80 | 80 | 80 | 40 |  |
| 12 | 160 | 80 | 40 | 80 | 40 |  |
| 13 | 80 | 80 | 40 | 40 | 20 |  |
| 14 | 40 | 40 | 20 | 20 | 20 |  |
| 15 | 80 | 40 | 20 | 10 | 10 |  |
| 16 | 80 | 80 | 80 | 80 | 80 |  |
| 17 | 80 | 40 | 20 | 40 | 20 |  |
| 18 | 80 | 80 | 40 | 80 | 80 |  |
| 19 | 40 | 40 | 20 | 40 | 20 |  |
| 20 | 160 | 80 | 20 | 80 | 20 |  |

aExpressed as the reciprocal of the highest serum dilution that inhibited 4 HAU units of virus. Results are the arithmetic mean titer of positive sera (HI titer >10). HI tests used 0.5% chicken RBCs.

**Supplementary Table 5.** Viral load in chickens infected with bovine A(H5N1) 2.3.4.4b viruses.

| Influenza A(H5N1) virus | Experimental group | Virus titers, log10EID50/mL (number of virus-positive/total number of chickens) | | | Mean survival day ± SE |
| --- | --- | --- | --- | --- | --- |
| 2 dpi | 4 dpi | 6 dpi |
| bovine/OH/439 | Donor | 5.5 (1/1) | -- | -- | 2 ± 0.0 |
| DC | 1.5 (3/9) | (0/2) | 7.5 (1/2) | 3.4 ± 0.2 |
| goose/KS/930F | Donor | -- | -- | -- | 2 ± 0.0 |
| DC | 2.1(6/8) | 6.25 (1/1) | -- | 4.3 ± 0.4 |

--, all chicken in the group died.

**SUPPLEMENTARY METHODS**

**Ethic statement and laboratory facilities**

Animal experiments were approved by the St. Jude Children’s Research Hospital Institutional Animal Care and Use Committee (IACUC) and complied with the policies of the National Institutes of Health and the Animal Welfare Act. Experiments utilizing select agents were performed in USDA-inspected Animal Biosafety Level 3+ animal facilities following regulations of Division of Agricultural Select Agents and Toxins at USDA APHIS, and defined by U.S. Federal Select Agent Program regulations (7 CFR Part 331, 9 CFR Part 121.3, 42 CFR Part 73.3). Human sera samples were obtained from the U.S. National Institutes of Health, National Institute of Allergy and Infectious Diseases, and Division of Microbiology and Infectious Diseases; they played no role in our study design. The samples were not specifically collected for the current study, nor did we have access to subject identifiers or protected health information related to individual samples

**A(H5N1) viral load in experimentally infected chickens**

The oropharyngeal swabs were collected at 1, 3, and 5 dpc from each surviving contact chicken and 2 dpi from a single surviving donor chicken. Virus load was determined by injecting serial dilutions into 10-day-old eggs. After incubation for 48 h at 35°C, virus titers (log10EID50/mL) in swabs were estimated by the Reed and Muench46 method from hemagglutinin test using chicken red blood cells (0.5% in PBS).

**SUPPLEMENTARY RESULTS**

**Histopathological changes in lower respiratory tract and extrapulmonary tissues of mice infected with bovine HPAI A(H5N1) 2.3.4.4b viruses**

In addition to extensive A(H5N1) antigens detection in nasal epithelium, lung, brain, spinal cord, liver, and brown adipose tissue, small, scattered foci of infection were detected in sensory ganglia, maxillary glands, pituitary gland, middle ear, eustachian tube, developing incisor teeth (odontoblasts only), bone marrow and skeletal muscle, and retina (Supplementary Fig. 2a-i). Lesions in the liver consisted of scattered small foci of hepatocellular necrosis and inflammation, including virus-positive hepatocytes, stellate cells, and Kupffer cells. Bile duct and gall bladder epithelium were negative for viral antigen in all mice. Multifocal randomly distributed virus-positive areas in the brain showed intracytoplasmic, intranuclear, and axonal immunolabeling of neurons and glial cells. Virus-positive cells were also present in the ependyma, choroid plexus, and meninges. The other major site of virus replication in these mice was in the brown (but not white) adipose tissue. At this point,bovine HPAI A(H5N1) 2.3.4.4binfection of brown fat was not associated with any obvious degenerative changes or inflammation.  Lastly, small numbers of viral antigen-positive cells were detected in sensory ganglionic neurons, the pituitary gland, and incisor teeth (odontoblasts).

**Viral load in chickens infected with bovine HPAI A(H5N1) 2.3.4.4b viruses**

Due to the high virulence of both A(H5N1) viruses used, few chickens were available for determination of virus load in the course of infection. Oropharyngeal were taken from one donor chicken, 17 contact chickens at 2 dpi (1 dpc) and only two of those birds survived beyond 4 dpi. One swab sample was collected on 6 dpi. Except for the contact chickens at 2 dpi there were not enough samples to conduct meaningful analysis or comparisons, and there were large variations among those samples (Supplementary Table 5). Higher virus titers (mean 0.6 log10EID50/mL for, or approximately one-half log) were found in goose/KS/903F (H5N1) virus-infected contact chickens compared to bovine/OH/439 (H5N1) contact chickens at 2 dpi (1 dpc). Birds sampled on the day of death or euthanasia shed virus at much higher titers than asymptomatic birds.
